# Supplementary material
Source: ML conference proceedings conference paper supplement (https://proceedings.neurips.cc/paper_files/paper/2012/hash/8f1d43620bc6bb580df6e80b0dc05c48-Abstract.html)
Supplement: Supplementary file 1 [file 8f1d43620bc6bb580df6e80b0dc05c48-Supplemental.zip]

Archive with 1 entries (1 files):
- nips2012_supp.pdf
